# Supplementary material
Source: publisher site journal article supplement (https://www.dovepress.com/article/298727)

# S1

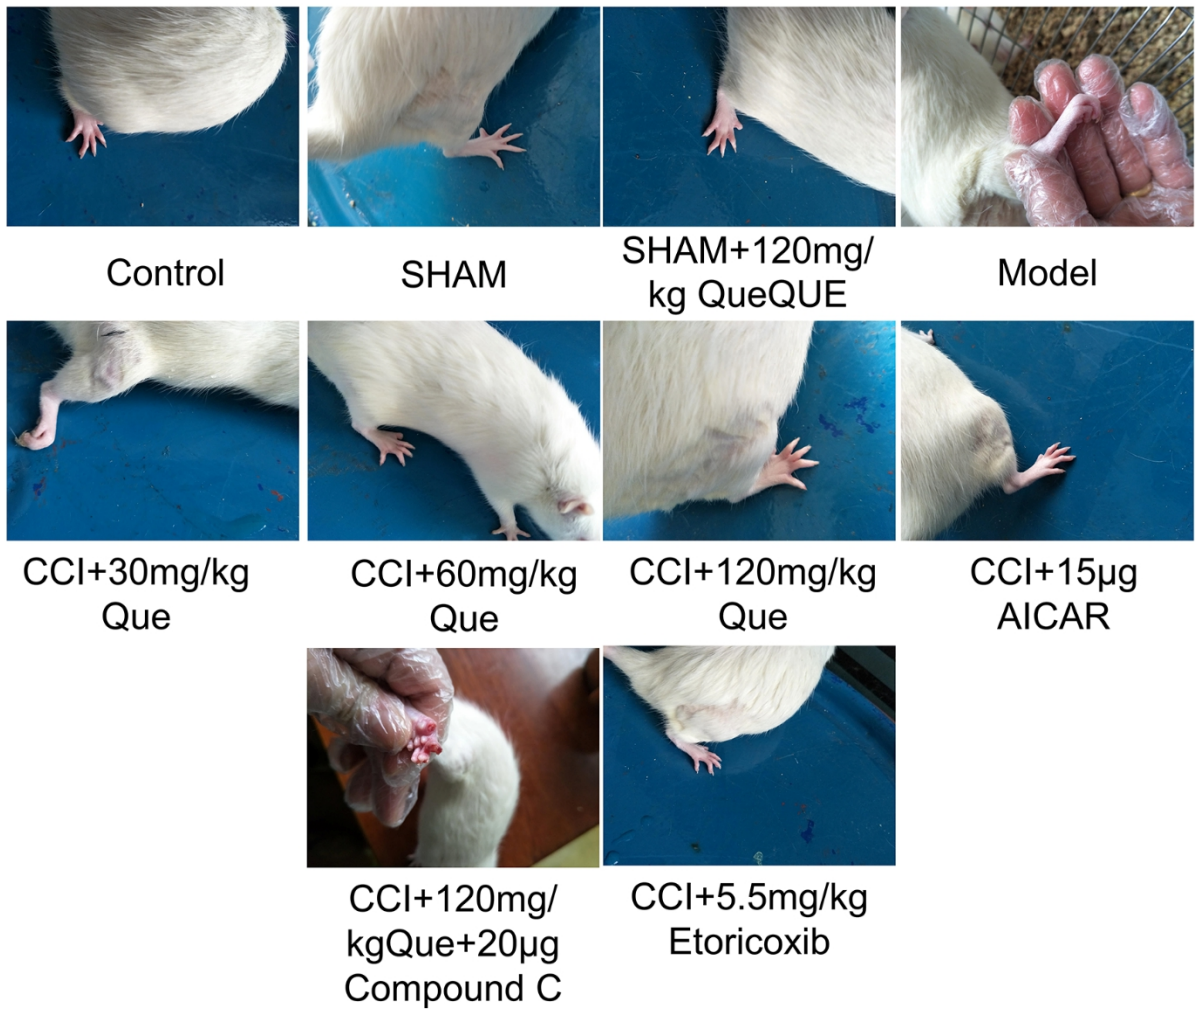

Figure S1 Foot morphology of rats in different treatment groups.

Supplement: Supplementary file 1 [file get_supplementary_file.php]
